# Supplementary material for: Investigations of clustering of ions and diffusivity in concentrated aqueous solutions of lithium chloride by molecular dynamic simulations
Source: Royal Society of Chemistry journal article supplement (doi:10.1039/c4ra15124k), 2015-01-01

1 **Supporting Data for “Investigations of Clustering of Ions and Diffusivity in Concentrated**  
2 **Aqueous Solutions of Lithium Chloride by Molecular Dynamic Simulation”**

3 RDF plots other than 5.9 M concentration solution of LiCl are shown below.

4 **Figure 1. RDF Plot for 0.22 M concentration of LiCl solution**

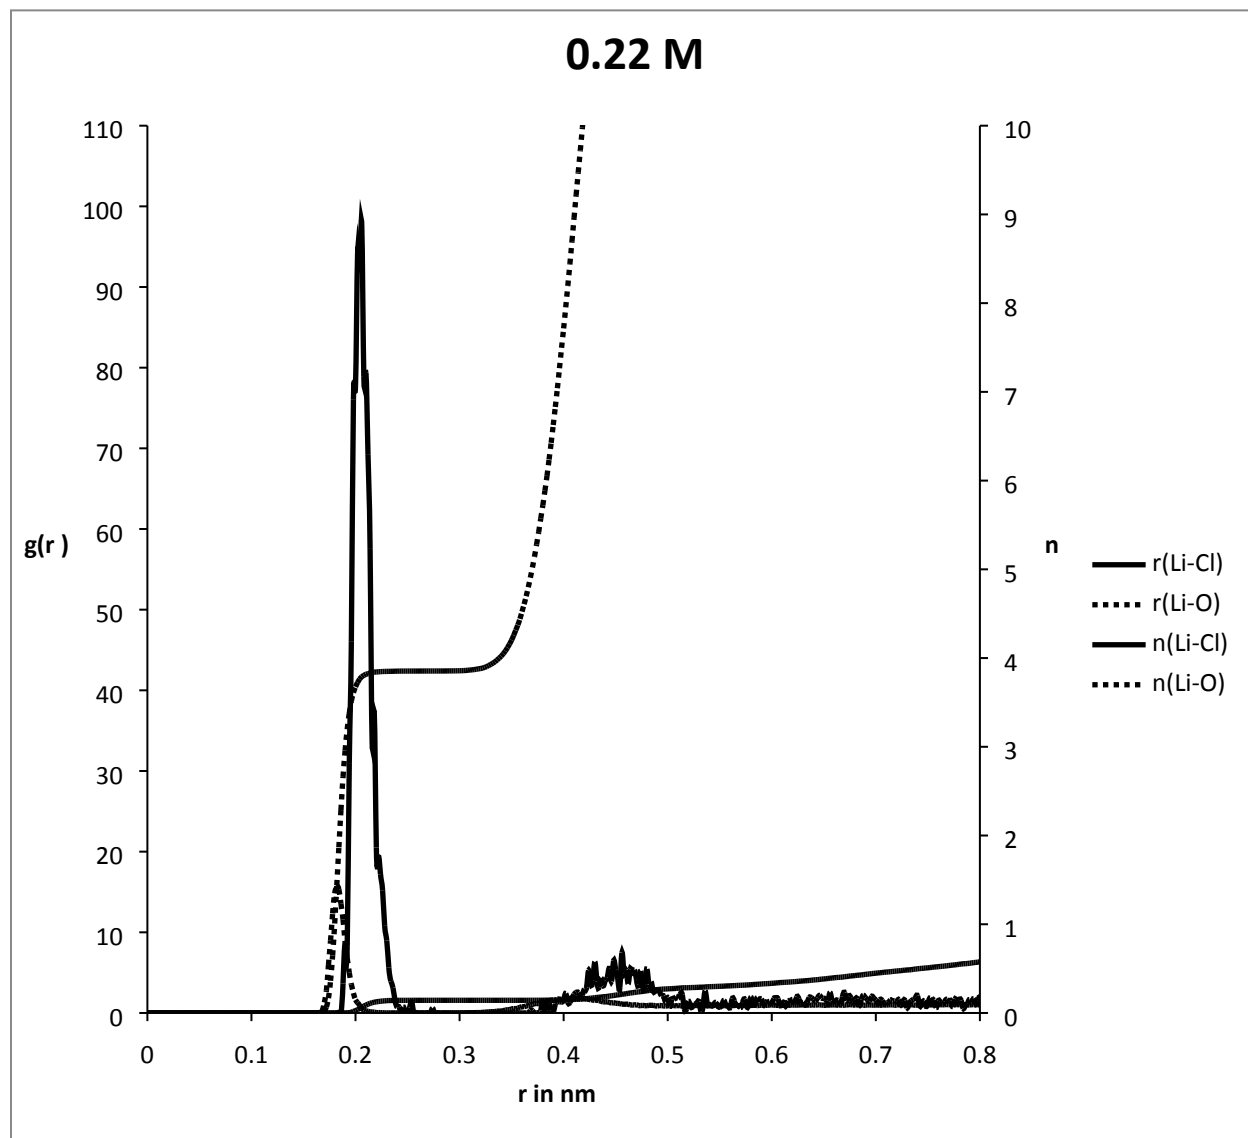

5

6

1 Figure 2. RDF Plot for 0.346 M concentration of LiCl solution

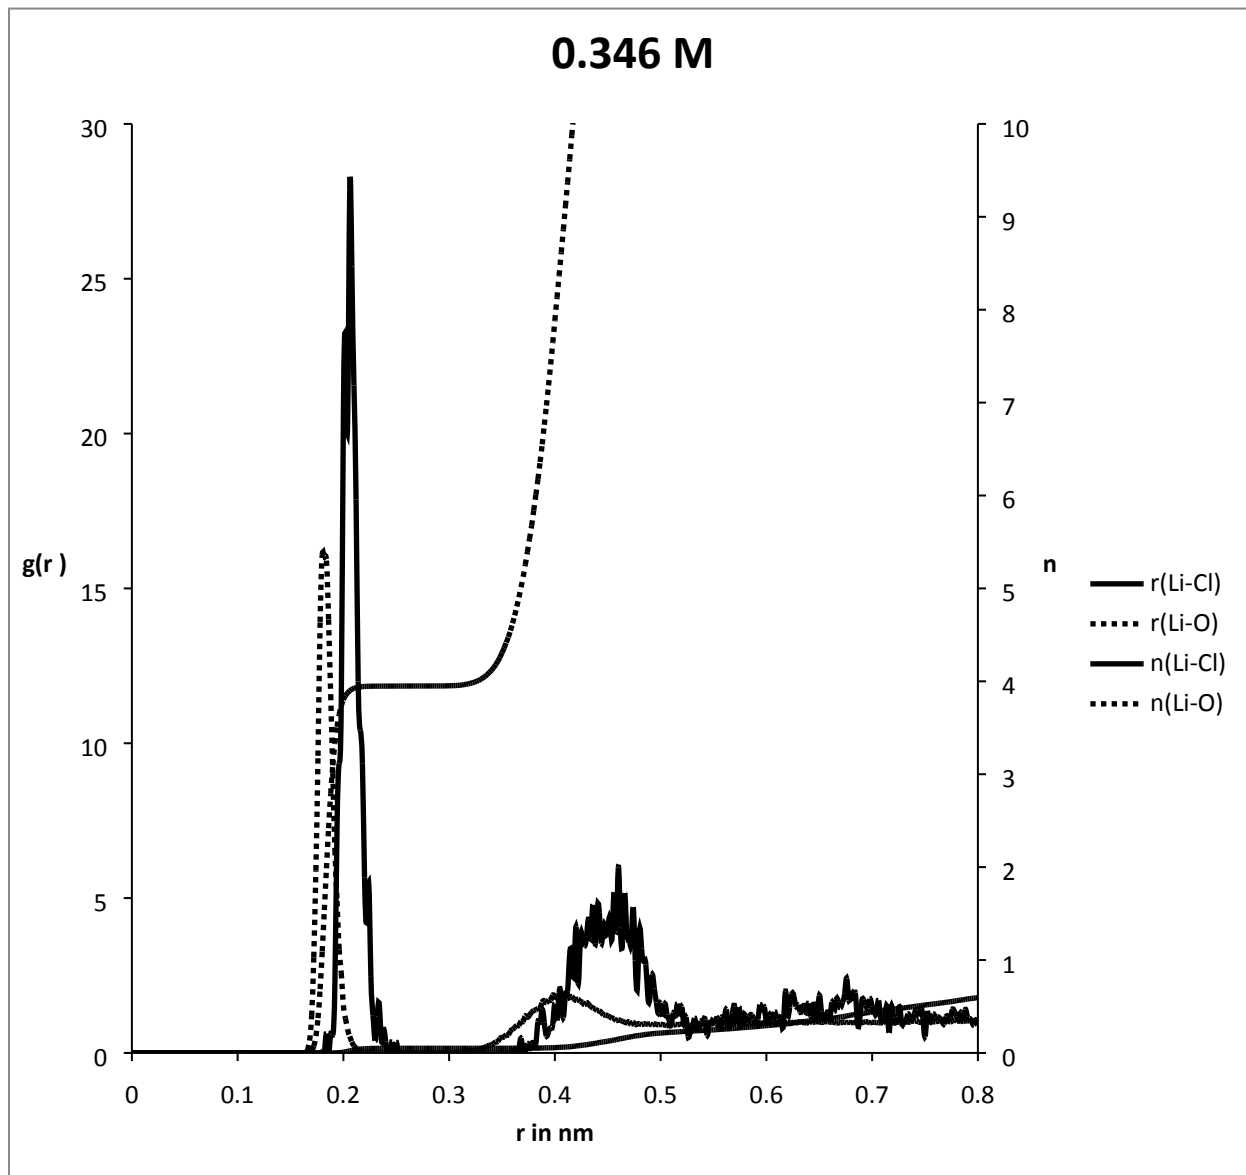

2

3

1 Figure 3. RDF Plot for 1.268 M concentration of LiCl solution

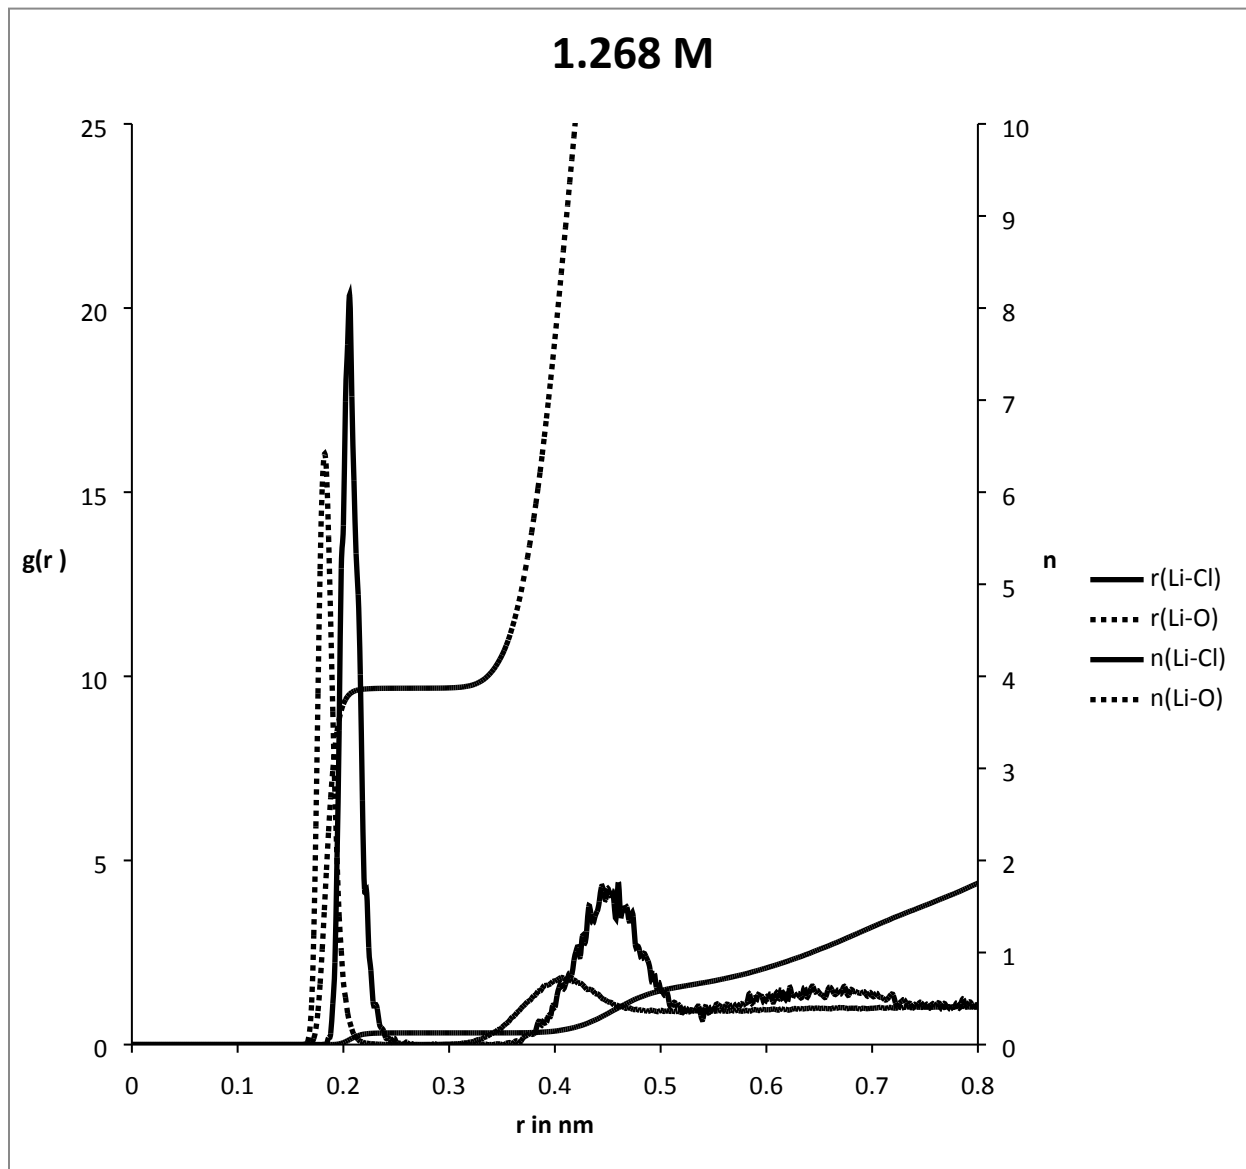

2

3

1 Figure 4. RDF Plot for 3.364 M concentration of LiCl solution

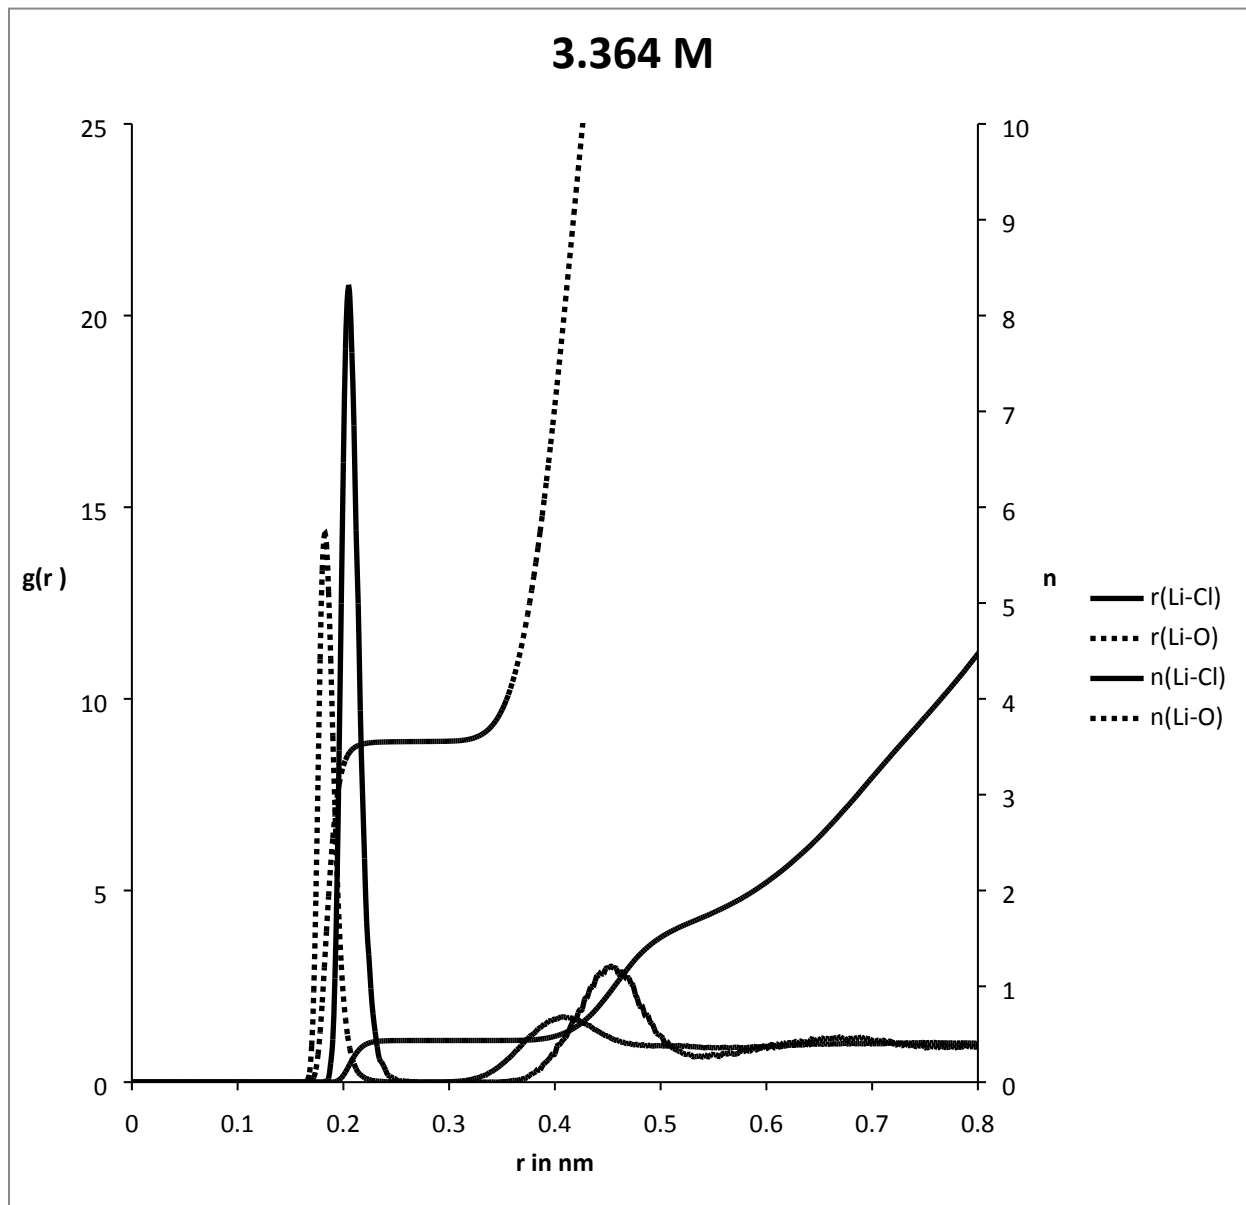

2

3

1 Figure 5. RDF Plot for 5.90 M concentration of LiCl solution

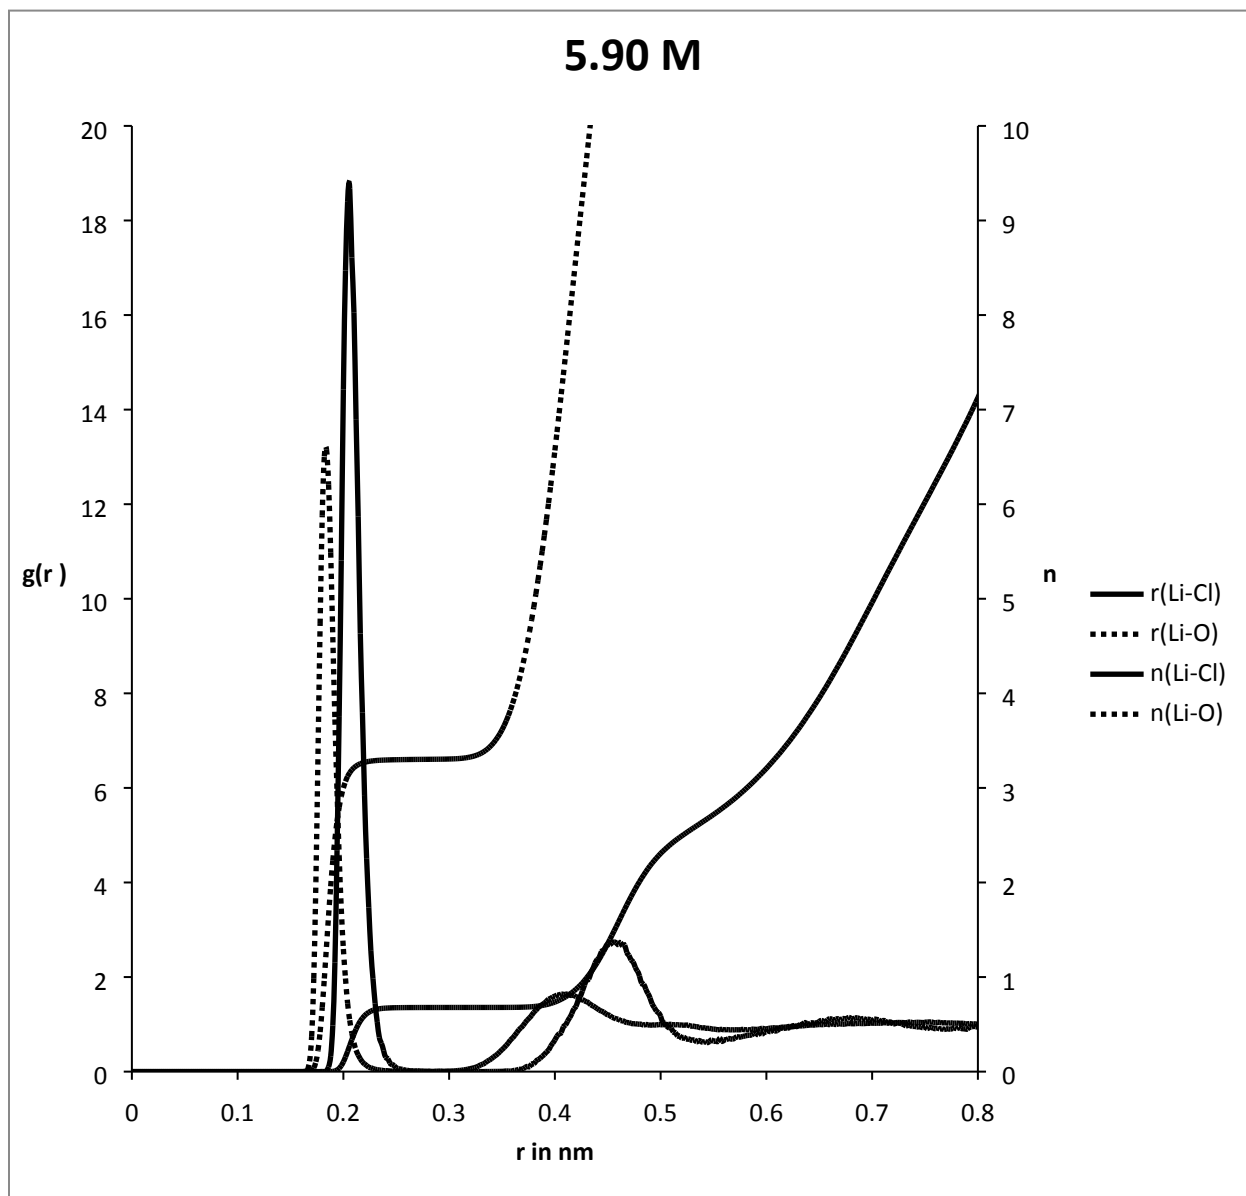

2

1 Figure 6. RDF Plot for 7.01 M concentration of LiCl solution

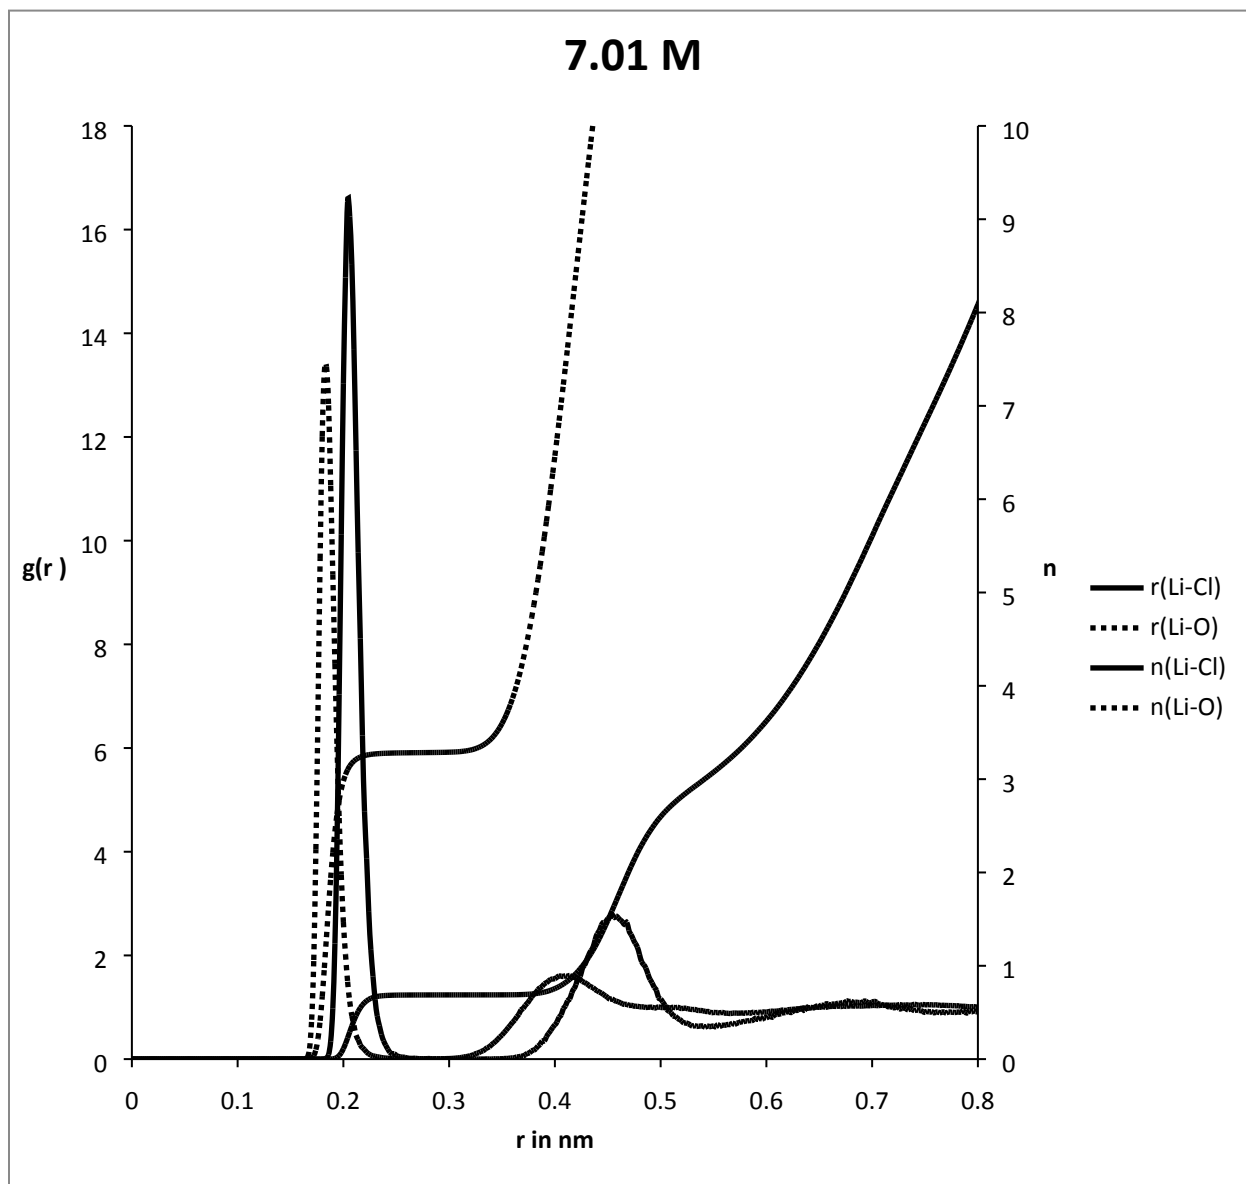

2

3

1 Figure 7. RDF Plot for 8.01 M concentration of LiCl solution

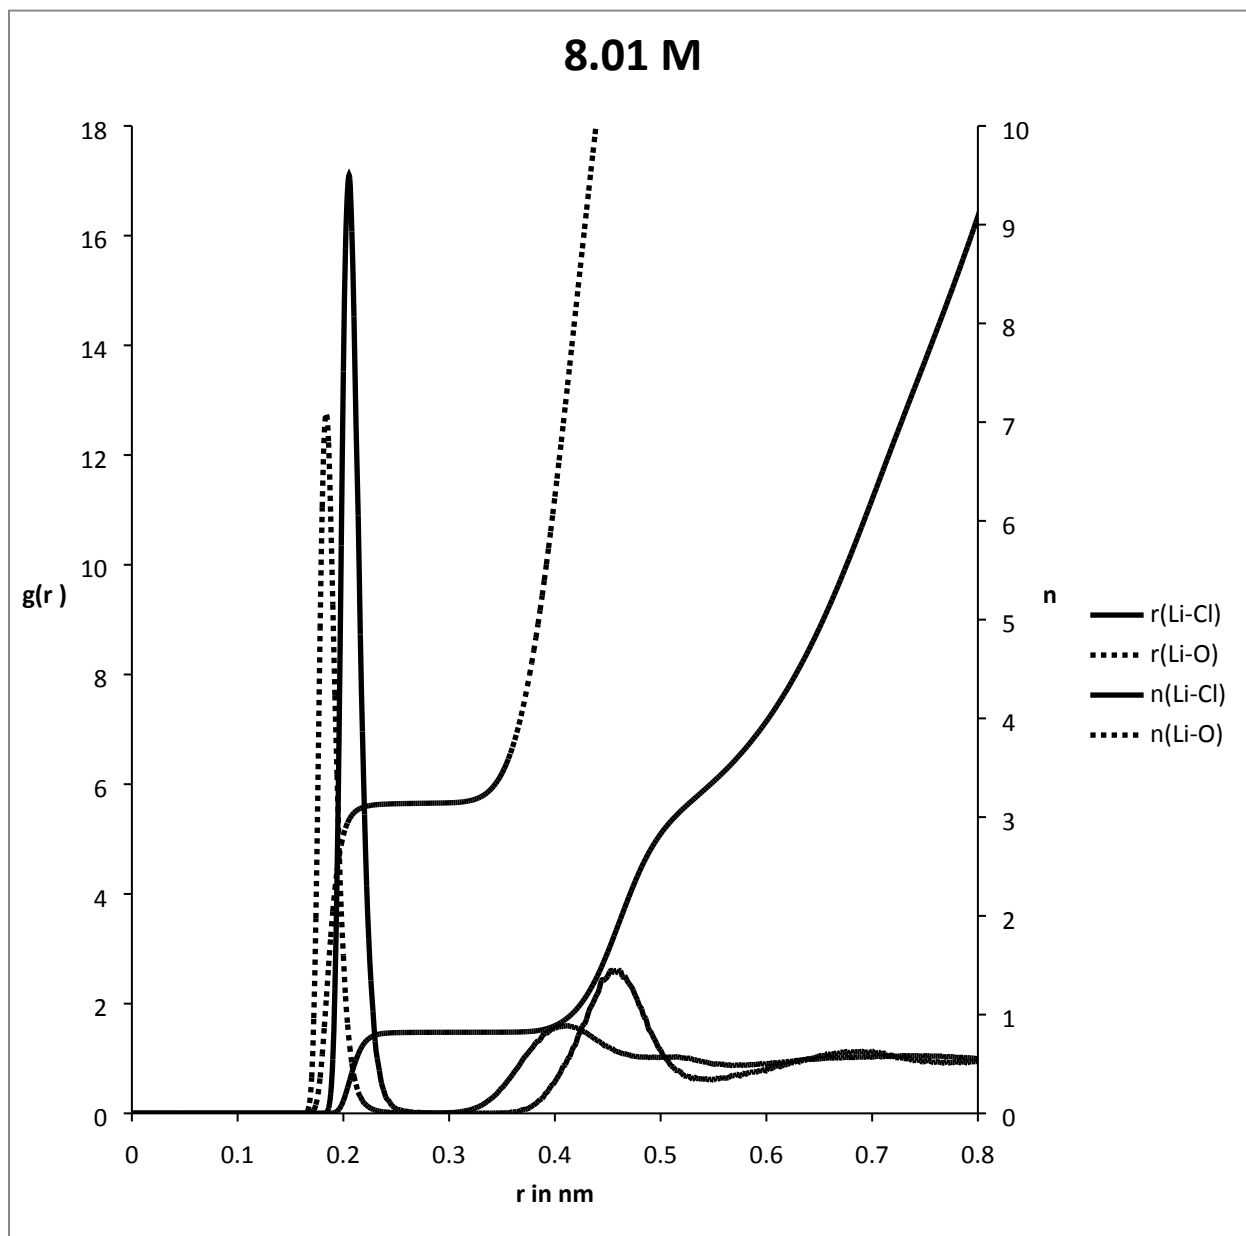

2

3

1 Figure 8. RDF Plot for 12.03 M concentration of LiCl solution

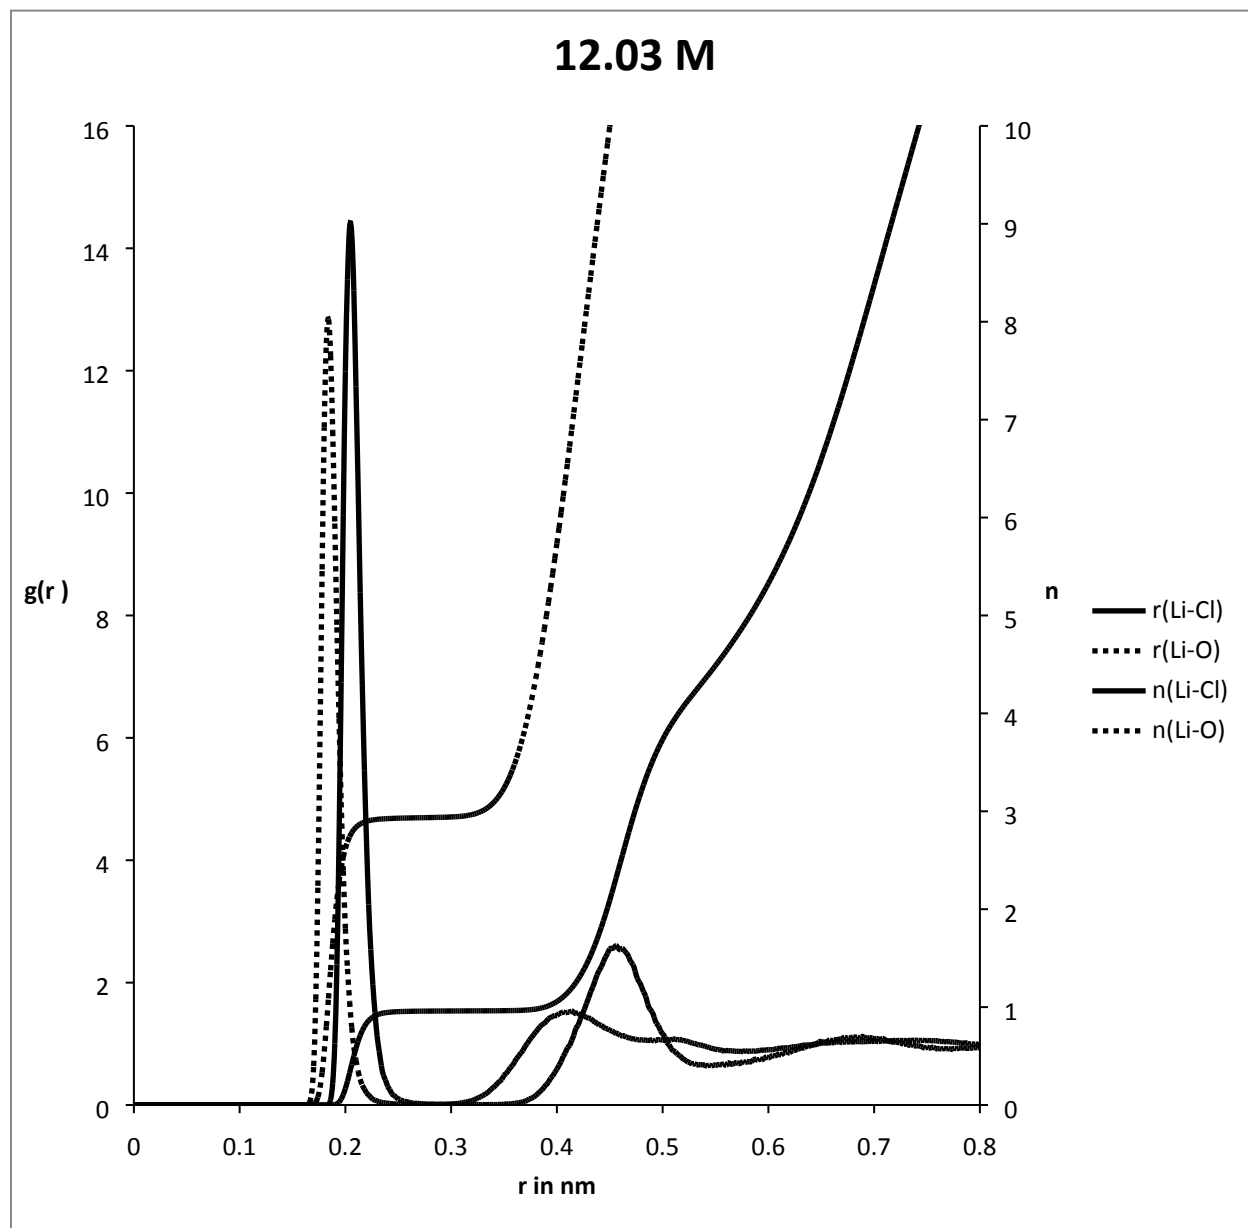

2



1 Figure 9. RDF Plot for 15.73 M concentration of LiCl solution

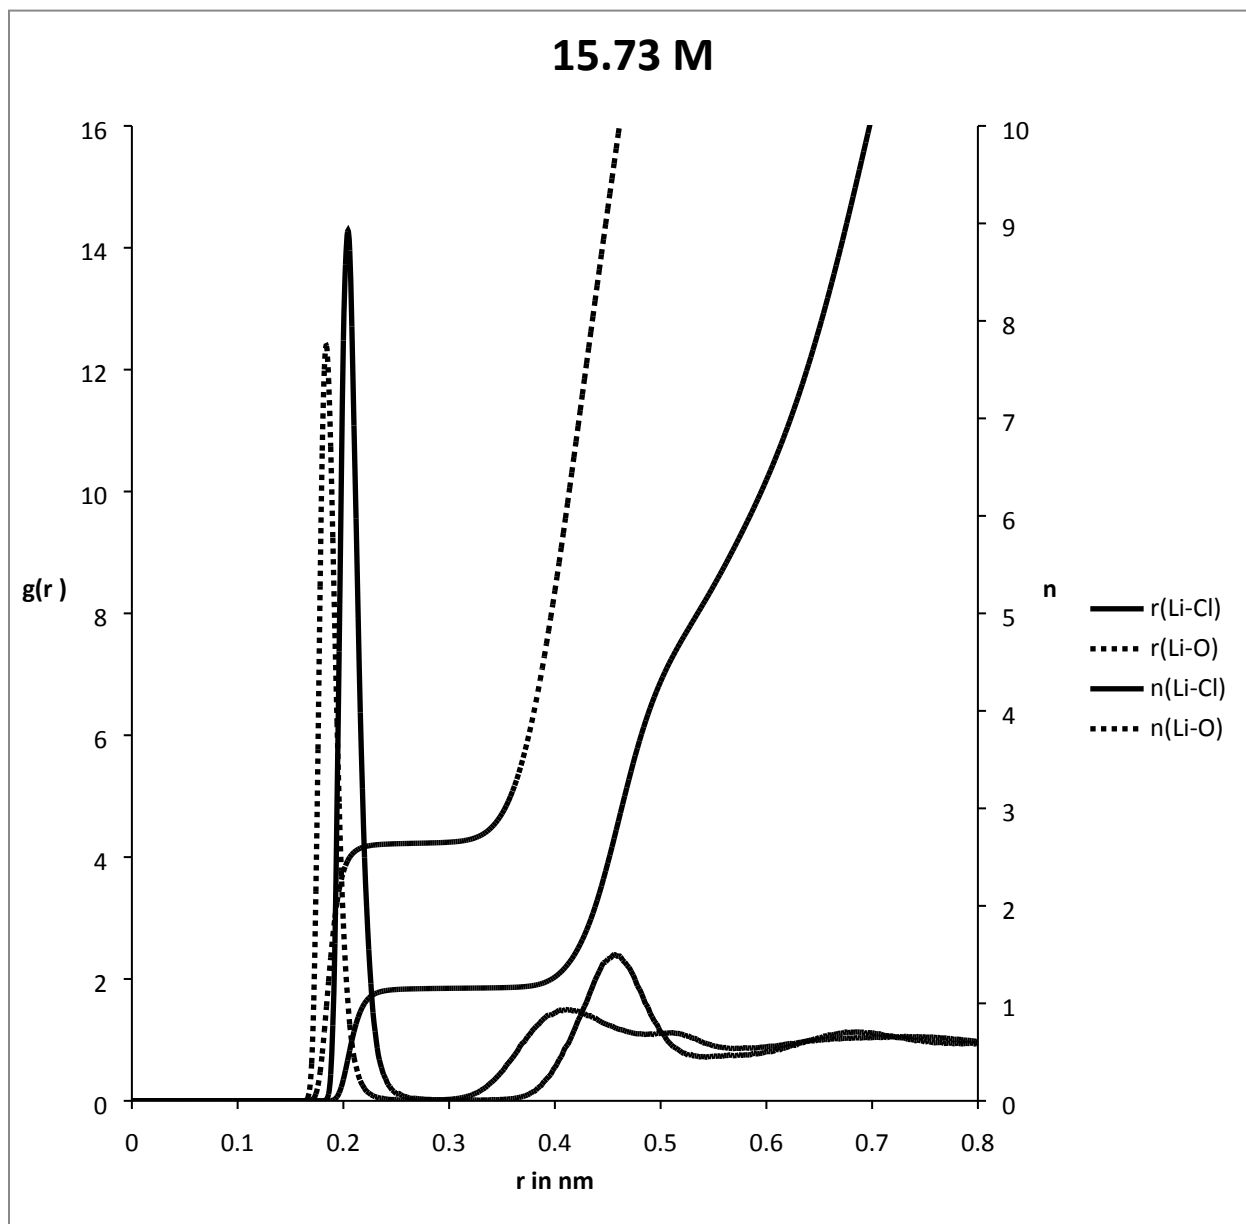

2

3

1 **Figure 10. RDF Plot for 16.86 M concentration of LiCl solution**

2

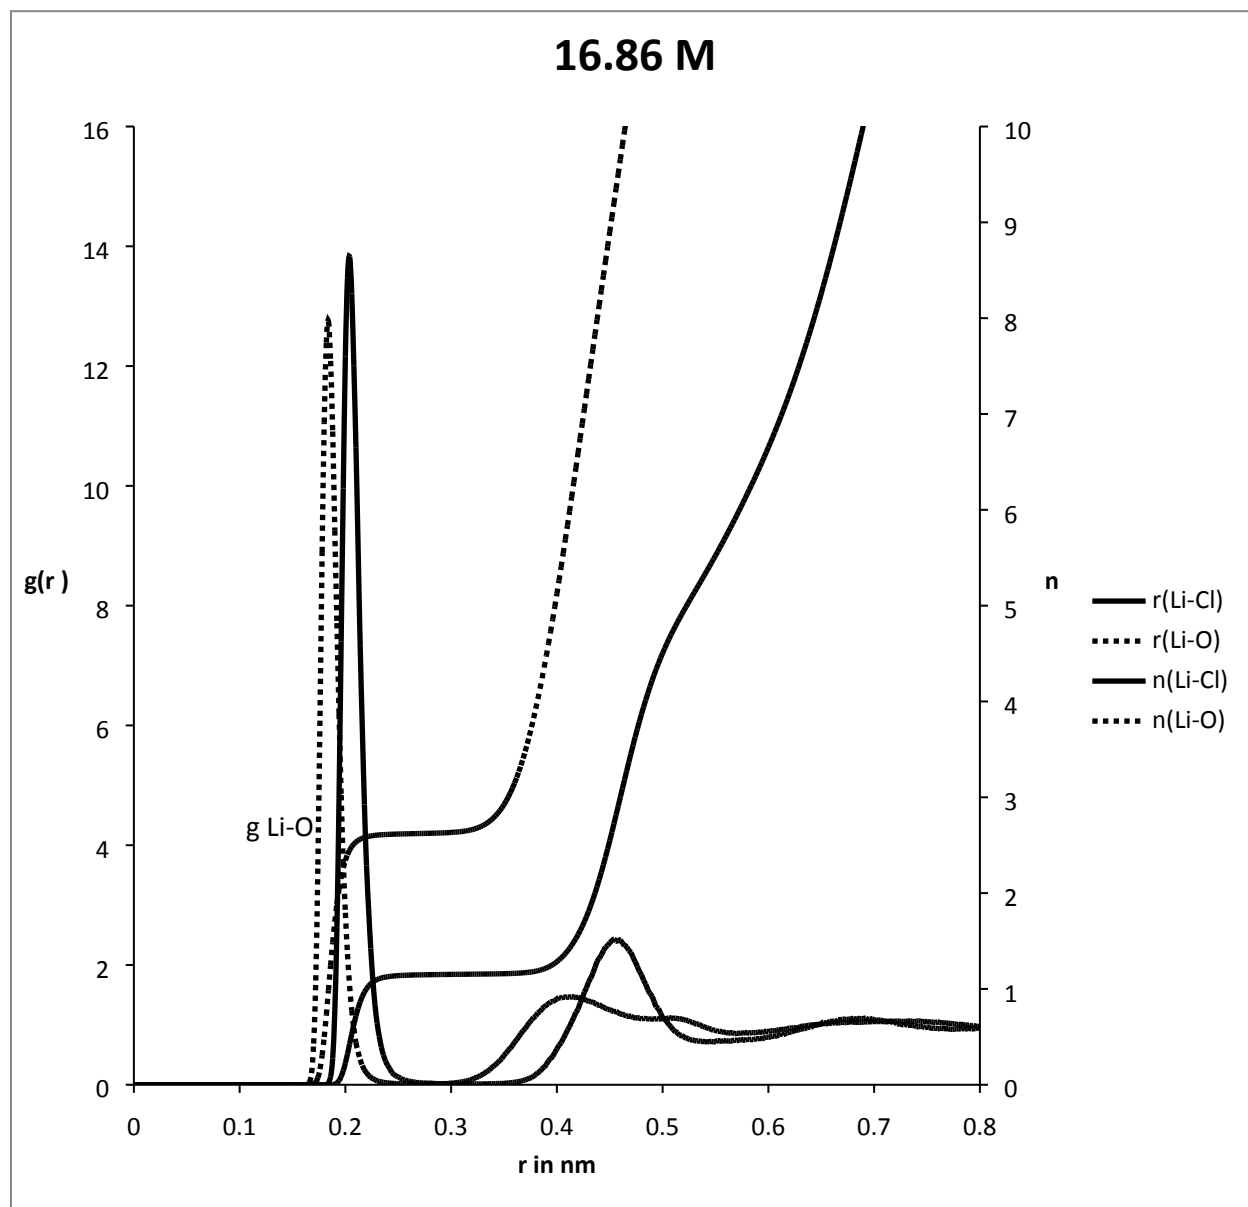

3

4

1 Figure 11. RDF Plot for 17.89 M concentration of LiCl solution

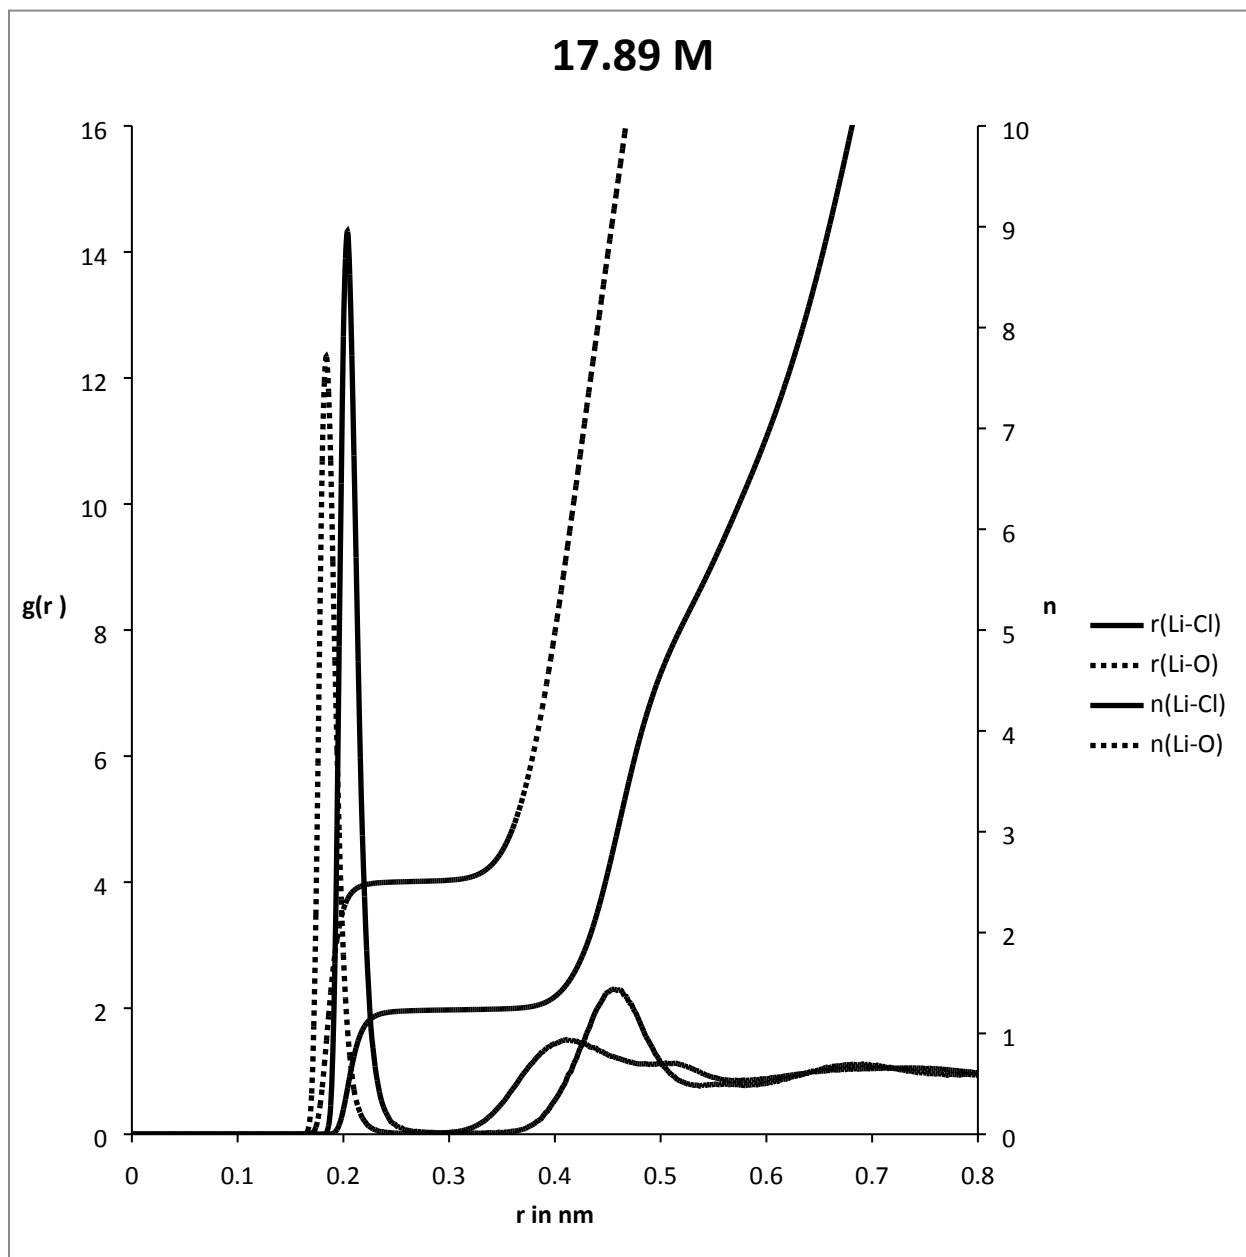

2

3

1 Figure 12. RDF Plot for 19.28 M concentration of LiCl solution

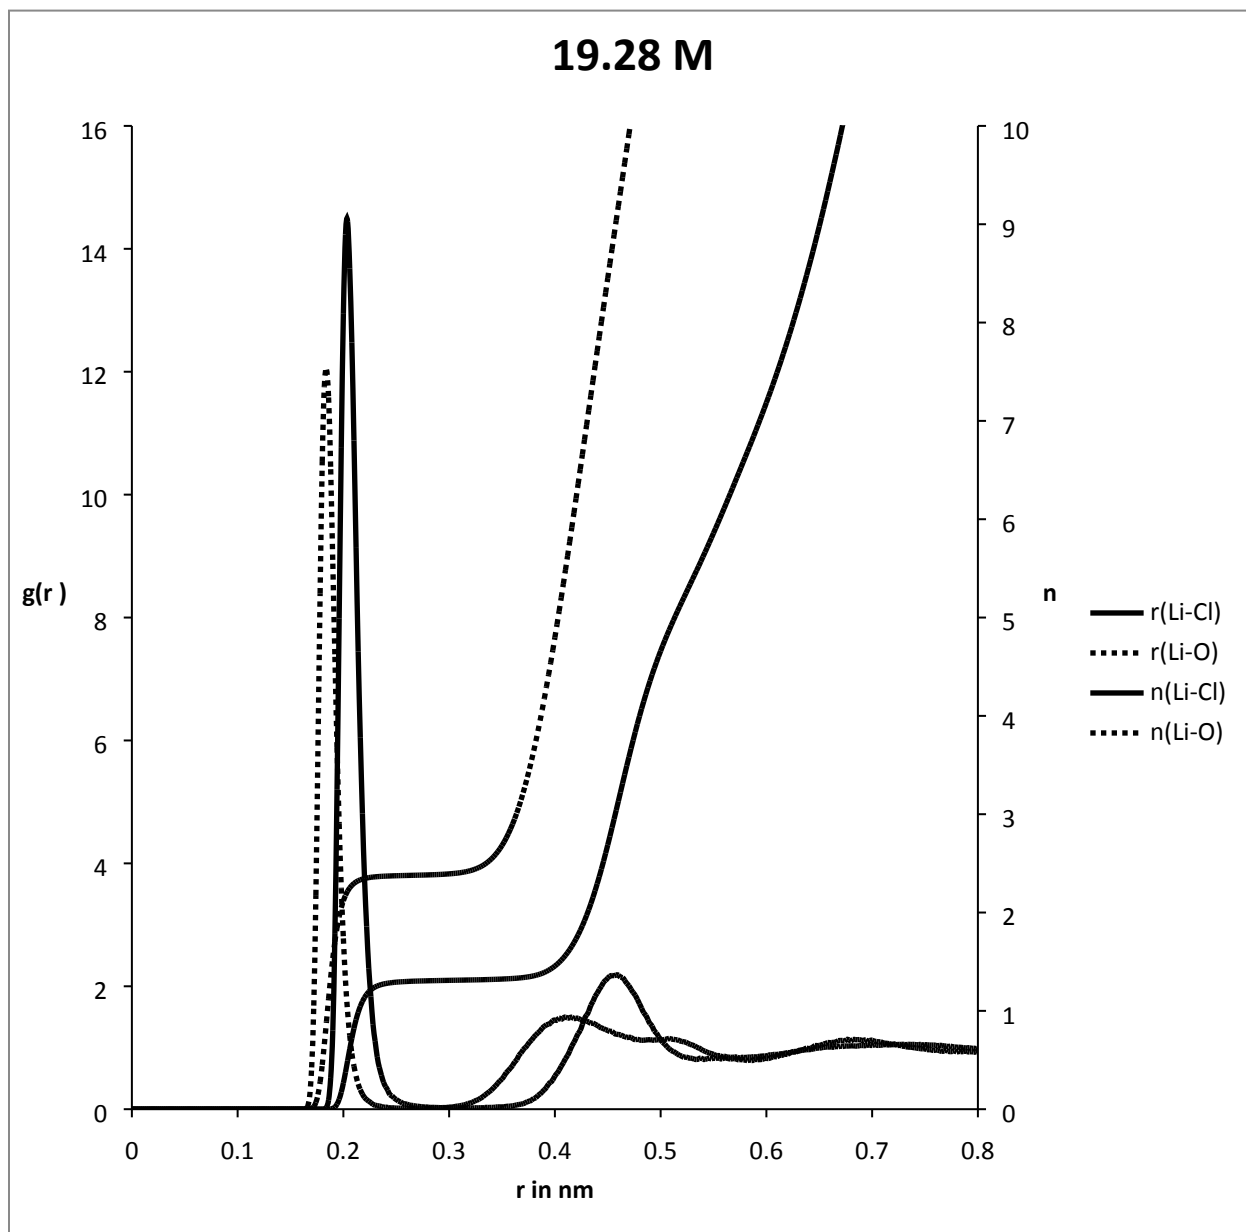

2

3

- 1 Figure 13. The quantitative comparison of RDF plots from experimental data, Aragonés
- 2 simulation and current work, a plot of peak height versus concentration

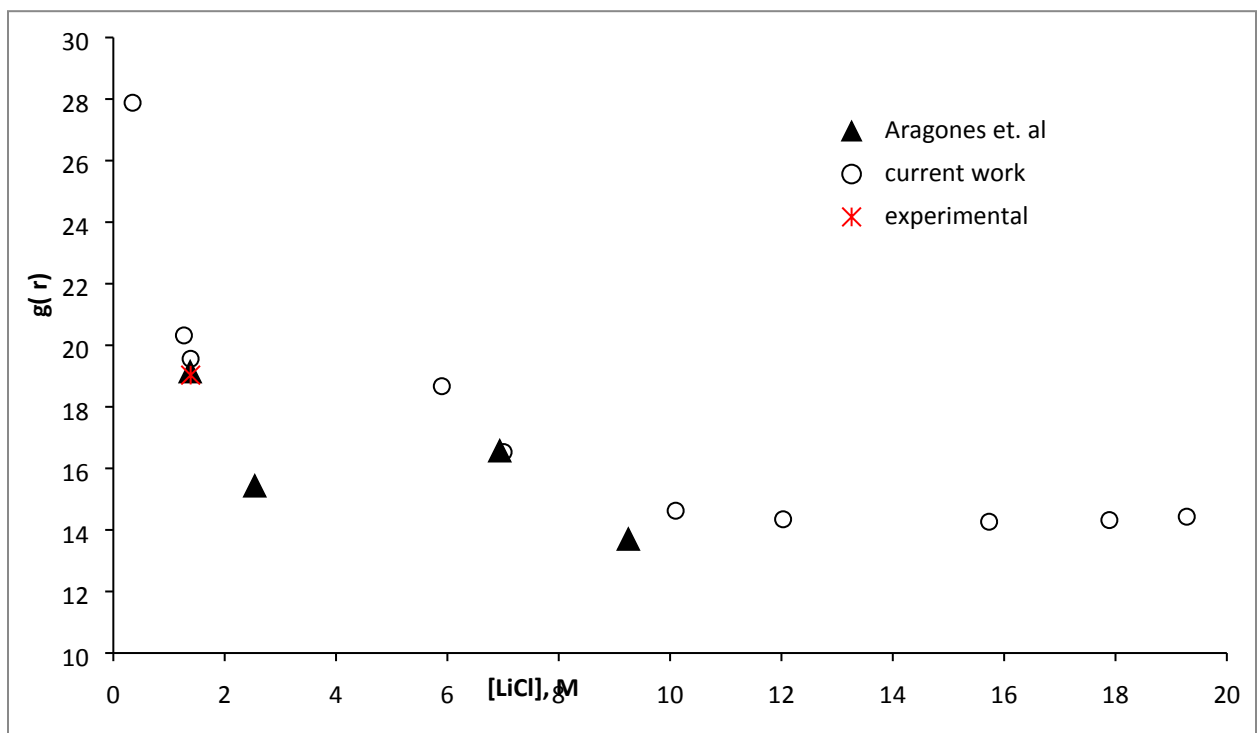

Supplement: c4ra15124k1.pdf [file c4ra15124k1.pdf]
